# Supplementary material for: Heat exposure and hospitalizations for chronic kidney disease in China: a nationwide time series study in 261 major Chinese cities
Source: PubMed Central journal article supplement (PMC10478241; doi:10.1186/s40779-023-00478-4), 2023-09-05
Supplement: 40779_2023_478_MOESM1_ESM.pdf [file 40779_2023_478_MOESM1_ESM.pdf]

**Table S1** ICD-10 codes of various CKD etiologies

| <b>Etiology of CKD</b>                                                                        | <b>All editions<sup>a</sup></b> | <b>China edition</b> | <b>Beijing edition</b> | <b>Clinic edition</b> |
|-----------------------------------------------------------------------------------------------|---------------------------------|----------------------|------------------------|-----------------------|
| Diabetes mellitus                                                                             |                                 |                      |                        |                       |
| Type 1 diabetes mellitus with renal complications                                             | E10.2 + N08.3                   |                      |                        |                       |
| Type 2 diabetes mellitus with renal complications                                             | E11.2 + N08.3                   |                      |                        |                       |
| Unspecified diabetes mellitus with renal complications                                        | E14.2                           |                      |                        |                       |
| Malnutrition-related diabetes mellitus with renal complications                               |                                 | E12.200 + N08.3      |                        | E12.200               |
| Other specified diabetes mellitus with renal complications                                    |                                 | E13.2                |                        | E13.200               |
| Hypertensive diseases                                                                         |                                 |                      |                        |                       |
| Hypertensive renal disease with renal failure                                                 | I12                             |                      |                        |                       |
| Hypertensive heart and renal disease with (congestive) heart failure                          | I13                             |                      |                        |                       |
| Pregnancy with hypertensive heart and renal disease                                           | O10.301                         |                      |                        |                       |
| Pregnancy with essential hypertension and proteinuria                                         | O11.x01                         |                      |                        |                       |
| Pre-existing hypertensive renal disease during pregnancy, childbirth and puerperium           |                                 | O10.200              |                        | O10.200               |
| Pregnancy with hypertensive renal disease                                                     |                                 | O10.201              |                        | O10.201               |
| Pre-existing hypertensive heart and renal disease during pregnancy, childbirth and puerperium |                                 | O10.300              |                        | O10.300               |
| Pre-existing hypertension with proteinuria                                                    |                                 | O11.x00              |                        | O11.x00               |
| Glomerular diseases                                                                           |                                 |                      |                        |                       |
| Recurrent and persistent hematuria                                                            | N02                             |                      |                        |                       |
| Chronic nephritic syndrome                                                                    | N03                             |                      |                        |                       |
| Nephrotic syndrome                                                                            | N04                             |                      |                        |                       |
| Unspecified nephritic syndrome                                                                | N05                             |                      |                        |                       |
| Isolated proteinuria with specified morphological lesion                                      | N06                             |                      |                        |                       |
| Persistent proteinuria, unspecified                                                           | N39.1                           |                      |                        |                       |
| Obstructive nephropathy                                                                       |                                 |                      |                        |                       |
| Hydronephrosis with ureteropelvic junction obstruction                                        | N13.0                           |                      |                        |                       |
| Hydronephrosis with ureteral stricture, not elsewhere classified                              | N13.1                           |                      |                        |                       |
| Hydronephrosis with renal and ureteral calculous obstruction                                  |                                 | N13.2                | N13.2                  | N13.200               |
| Other obstructive nephropathy                                                                 |                                 | N13.8                | N13.8                  | N13.801               |

<sup>a</sup> This value is given when the codes of the three versions are consistent. *ICD* International Classification of Diseases, *CKD* chronic kidney disease

**Table S2** Sensitivity analysis results on different model parameters

| <b>Parameter</b>                    | <b>Ambient high temperature<br/>[RR (95% CI)]</b> | <b>Heatwave<br/>[Added RR (95% CI)]</b> |
|-------------------------------------|---------------------------------------------------|-----------------------------------------|
| max_lag (d)                         |                                                   |                                         |
| 4                                   | 1.009 (1.006 – 1.012)                             | 1.058 (1.023 – 1.095)                   |
| 5                                   | 1.008 (1.004 – 1.012)                             | 1.075 (1.036 – 1.115)                   |
| 6                                   | 1.008 (1.004 – 1.012)                             | 1.099 (1.056 – 1.143)                   |
| 7                                   | 1.008 (1.003 – 1.012)                             | 1.116 (1.069 – 1.166)                   |
| 8                                   | 1.008 (1.004 – 1.013)                             | 1.128 (1.076 – 1.182)                   |
| 9                                   | 1.011 (1.006 – 1.016)                             | 1.143 (1.087 – 1.202)                   |
| df for humidity                     |                                                   |                                         |
| 2                                   | 1.009 (1.004 – 1.013)                             | 1.100 (1.065 – 1.157)                   |
| 3                                   | 1.008 (1.003 – 1.012)                             | 1.116 (1.069 – 1.166)                   |
| 4                                   | 1.008 (1.003 – 1.012)                             | 1.124 (1.075 – 1.175)                   |
| 5                                   | 1.008 (1.003 – 1.012)                             | 1.113 (1.065 – 1.164)                   |
| df for day of year                  |                                                   |                                         |
| 2                                   | 1.010 (1.006 – 1.015)                             | 1.094 (1.049 – 1.141)                   |
| 3                                   | 1.008 (1.003 – 1.012)                             | 1.116 (1.069 – 1.166)                   |
| 4                                   | 1.010 (1.005 – 1.014)                             | 1.080 (1.033 – 1.129)                   |
| 5                                   | 1.010 (1.005 – 1.015)                             | 1.085 (1.037 – 1.135)                   |
| df for calendar day                 |                                                   |                                         |
| 2/year                              | 1.003 (0.999 – 1.007)                             | 1.062 (1.019 – 1.107)                   |
| 3/year                              | 1.008 (1.003 – 1.012)                             | 1.116 (1.069 – 1.166)                   |
| 4/year                              | 1.013 (1.008 – 1.017)                             | 1.064 (1.014 – 1.116)                   |
| 5/year                              | 1.010 (1.005 – 1.015)                             | 1.093 (1.042 – 1.146)                   |
| Adjusted air pollutants             |                                                   |                                         |
| PM <sub>10</sub> + O <sub>3</sub>   | 1.008 (1.003 – 1.012)                             | 1.116 (1.069 – 1.166)                   |
| PM <sub>2.5</sub> + NO <sub>2</sub> | 1.007 (1.003 – 1.011)                             | 1.122 (1.074 – 1.172)                   |
| PM <sub>10</sub> + NO <sub>2</sub>  | 1.007 (1.003 – 1.011)                             | 1.117 (1.069 – 1.166)                   |
| PM <sub>2.5</sub> + O <sub>3</sub>  | 1.008 (1.003 – 1.012)                             | 1.120 (1.073 – 1.170)                   |

*CI* confidence interval, *df* degree of freedom, *PM*<sub>10</sub> particles with an aerodynamic diameter of 10 micrometers or less, *PM*<sub>2.5</sub> particles with an aerodynamic diameter of 2.5 micrometers or less, *NO*<sub>2</sub> nitrogen dioxide, *RR* relative risk

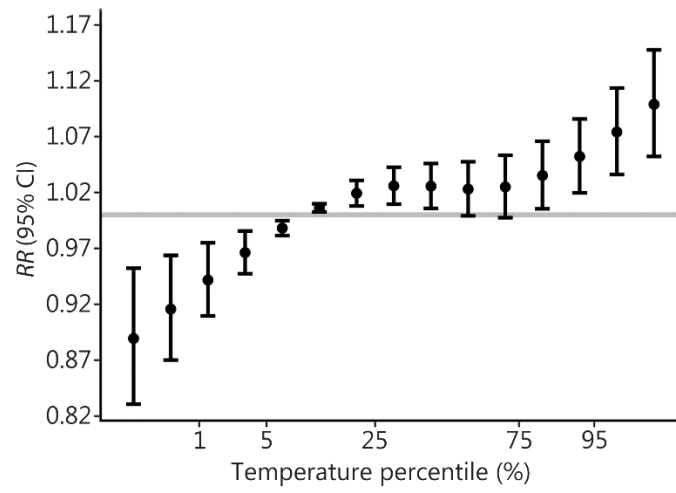

**Fig. S1** National averaged cumulative exposure-response curve of hospitalizations for CKD associated with ambient temperature in hot season. The gray horizontal line indicates  $RR = 1$ . CKD chronic kidney disease,  $RR$  relative risk

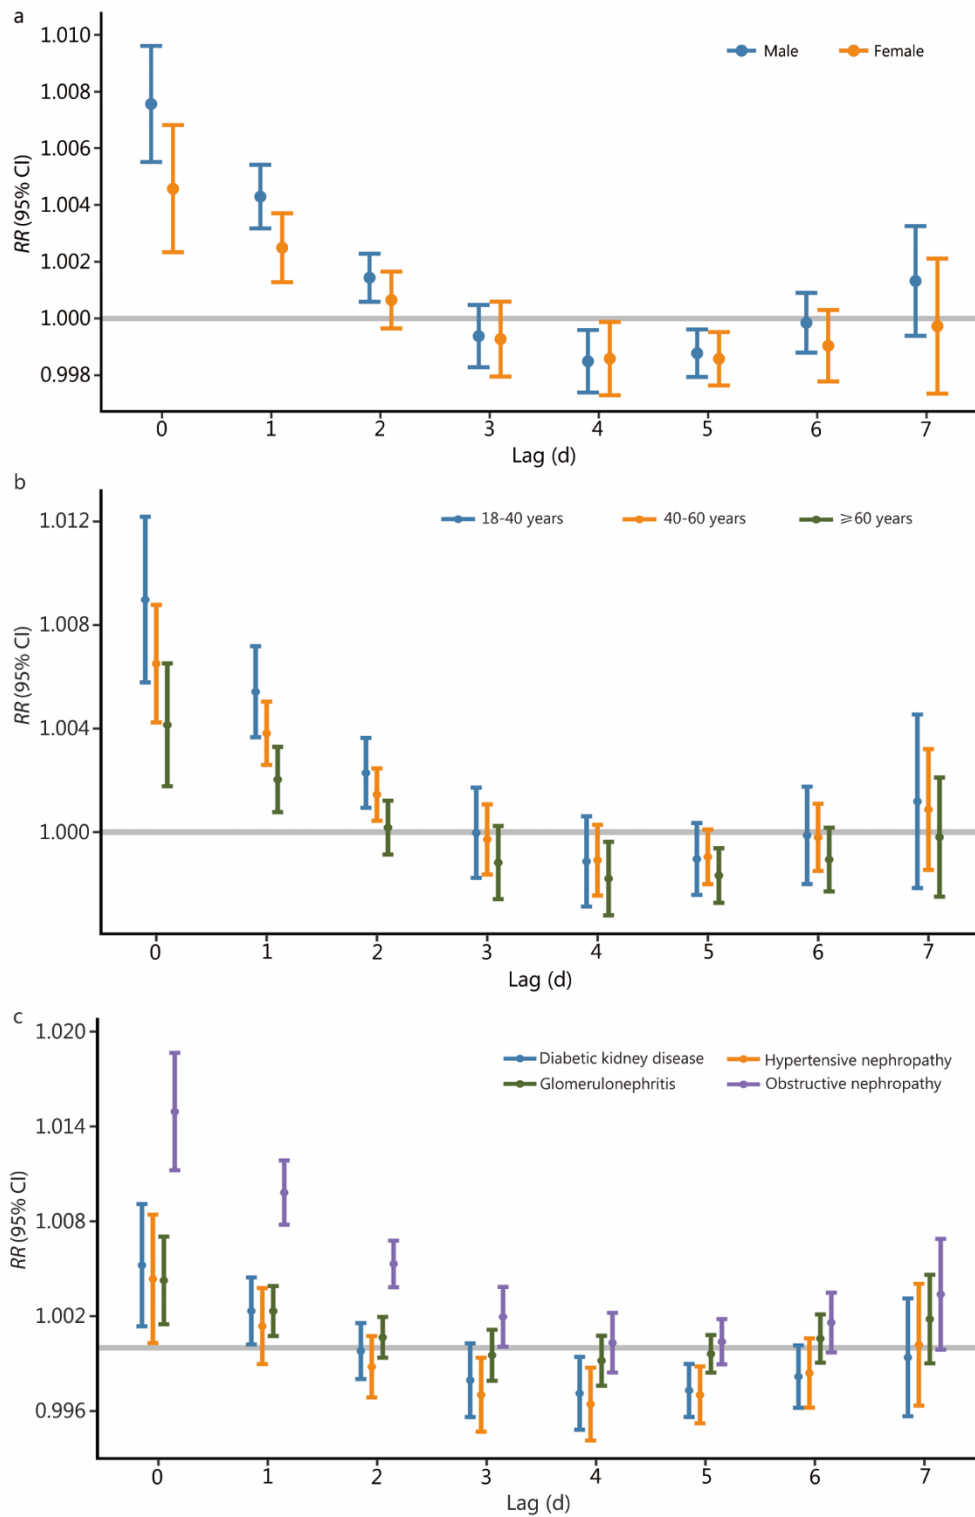

**Fig. S2** Association between every 1 °C increase in daily mean temperature and hospitalizations for CKD at lag 0 – 7 d by sex (a), age (b), and etiology of CKD (c). The gray horizontal line indicates  $RR = 1$ . CKD chronic kidney disease,  $RR$  relative risk

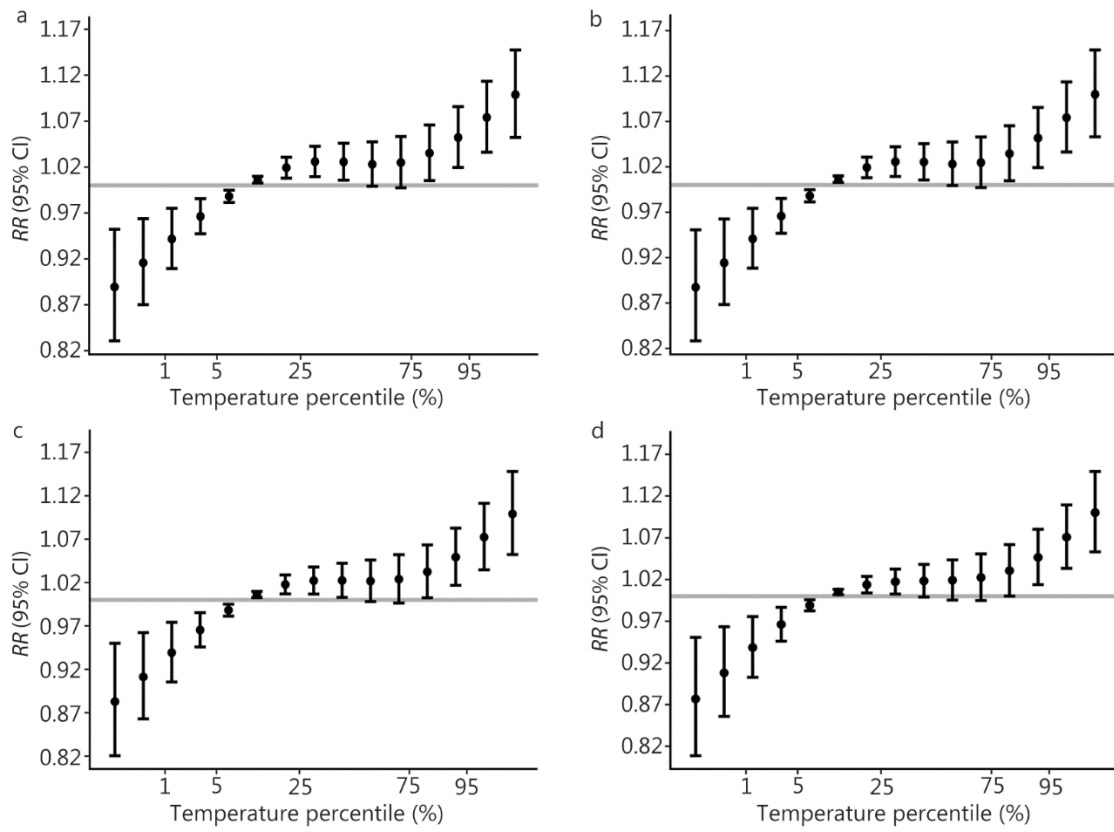

**Fig. S3** Exposure-response curves for different knot placements of temperature-response dimension in the cross-basis function. **a** Equal spaced knots. **b** Knots at 30th and 70th percentile. **c** Knots at 20th and 80th percentile. **d** Knots at 10th and 90th percentile. The gray horizontal line indicates  $RR = 1$ .  $RR$  relative risk
